# Supplementary material for: LPIAT, a lyso-Phosphatidylinositol Acyltransferase, Modulates Seed Germination in Arabidopsis thaliana through PIP Signalling Pathways and is Involved in Hyperosmotic Response
Source: MDPI journal article supplement (doi:10.3390/ijms21051654), 2020-02-28
Supplement: s1 [file s1]

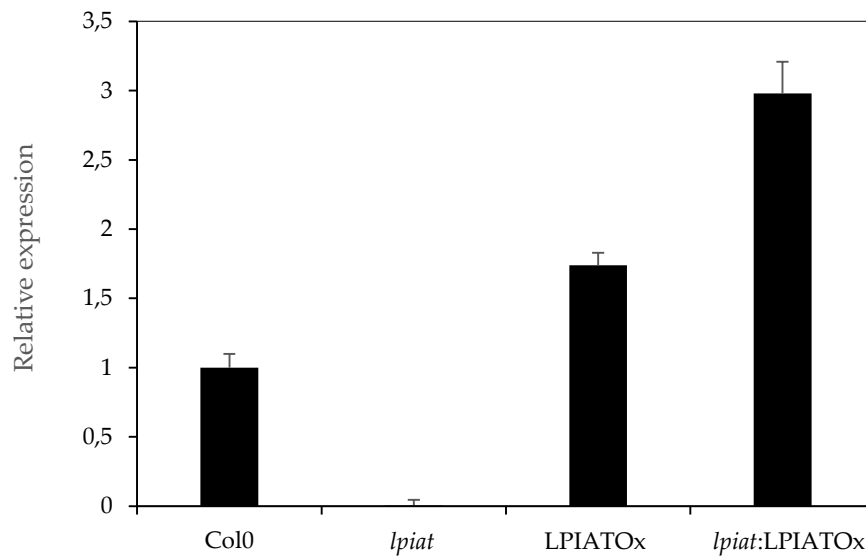

**Figure S6.** Expression of *LPIAT* in seed from wild-type, *lpiat*, overexpressing (LPIATOx) and rescue (*lpiat*:LPIATOx) lines. Values represent mean  $\pm$  SD of three technical replicates, representative of two biological replicates. Relative expression quantities are represented related to wild type level, which was set to one.
