# Supplementary material for: LPIAT, a lyso-Phosphatidylinositol Acyltransferase, Modulates Seed Germination in Arabidopsis thaliana through PIP Signalling Pathways and is Involved in Hyperosmotic Response
Source: MDPI journal article supplement (doi:10.3390/ijms21051654), 2020-02-28
Supplement: s1 [file s1]

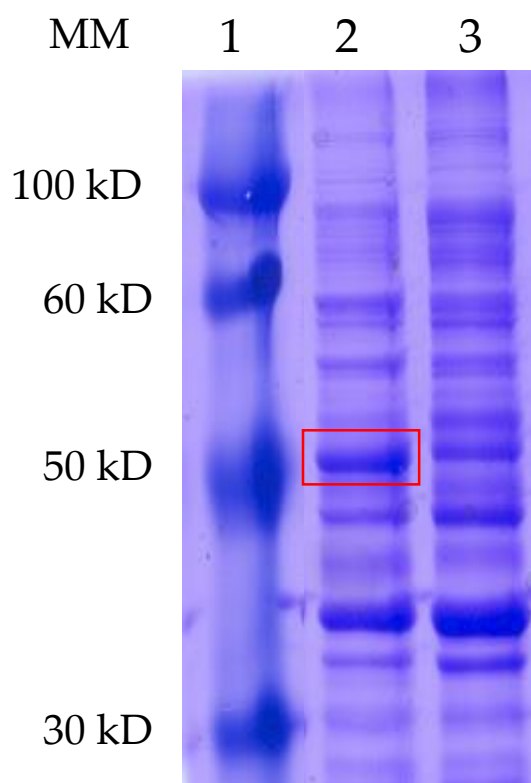

**Figure S3.** SDS-PAGE total protein analysis of microsomes from *E. coli* transformed by pET15b::*LPIAT* (lane 2) or empty pET15b (lane 3). MM, molecular marker (lane 1). 100  $\mu$ L of microsomes were centrifuged and resuspended in 10  $\mu$ L of loading buffer and loaded in a 12% polyacrylamide gel. After migration, proteins were revealed by Coomassie blue.
