# Supplementary material for: LPIAT, a lyso-Phosphatidylinositol Acyltransferase, Modulates Seed Germination in Arabidopsis thaliana through PIP Signalling Pathways and is Involved in Hyperosmotic Response
Source: MDPI journal article supplement (doi:10.3390/ijms21051654), 2020-02-28
Supplement: s1 [file s1]

# Dry seed

# 5h-Imbibed seed

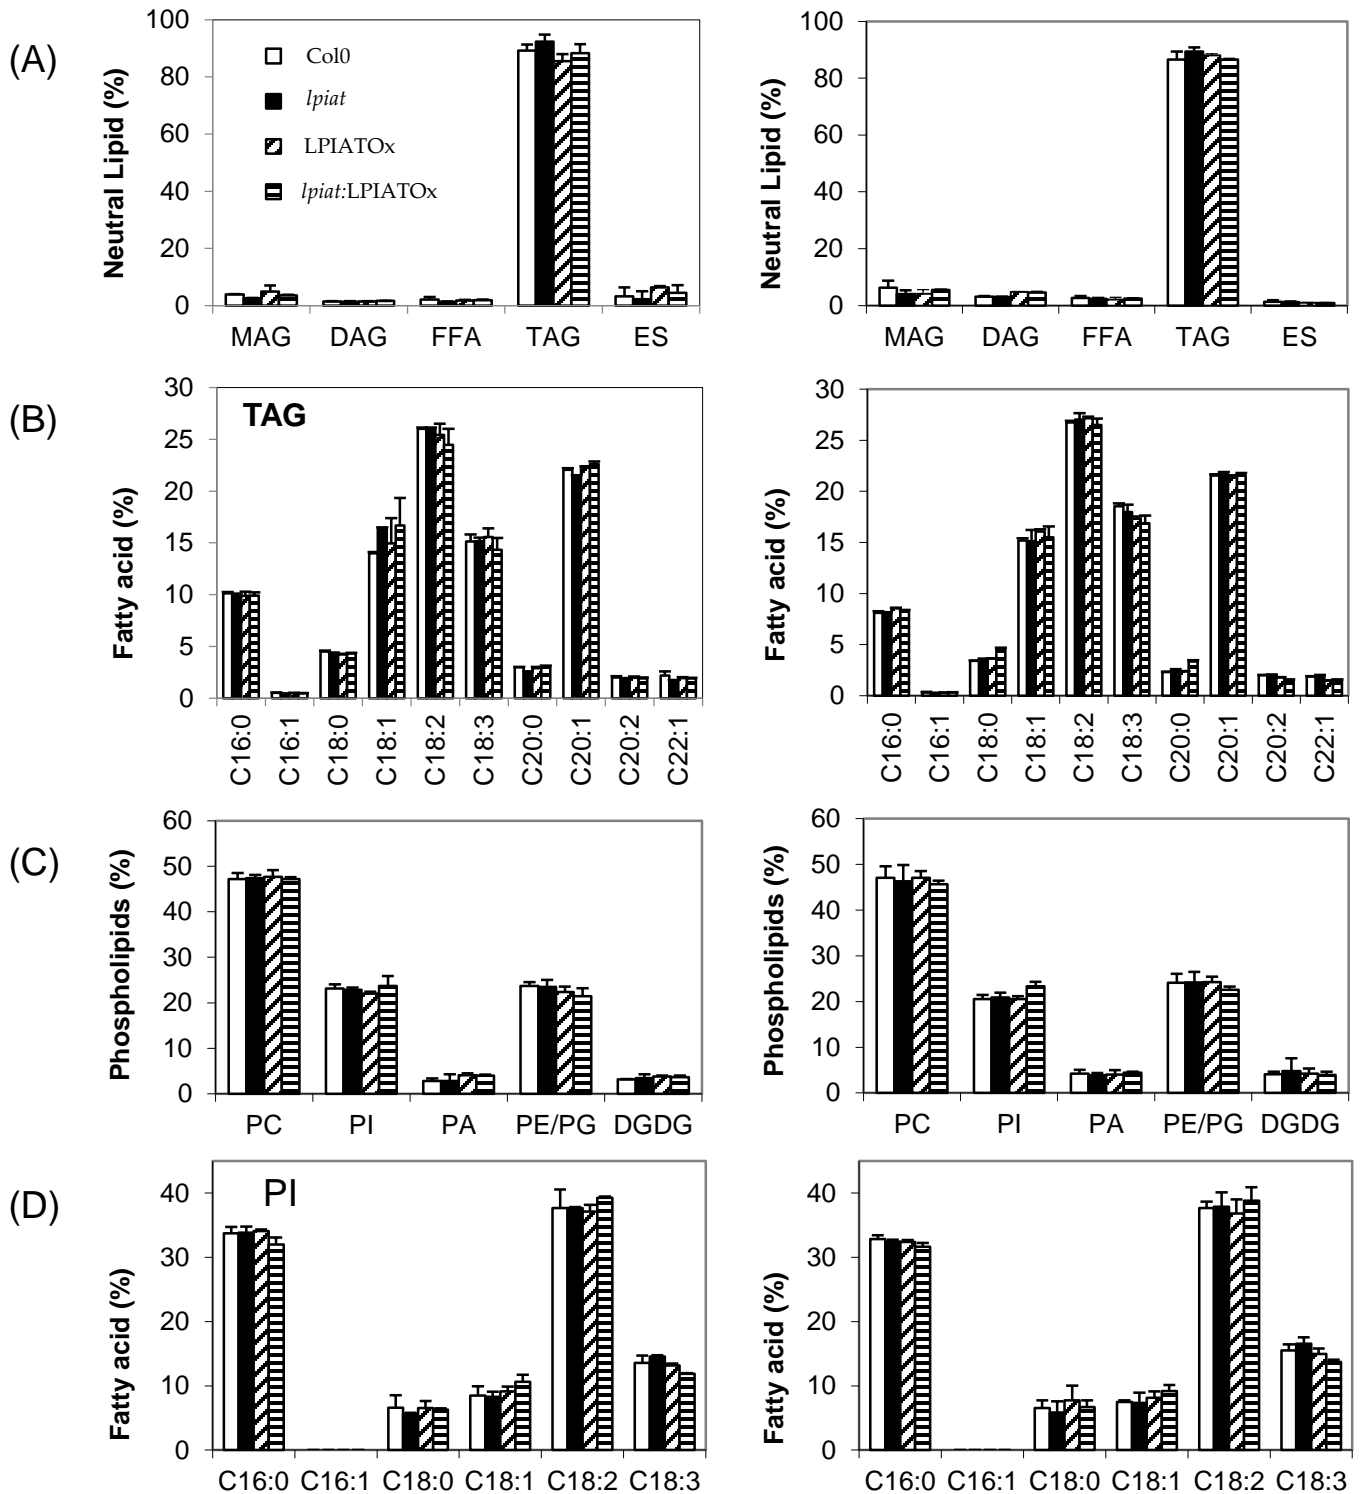

**Figure S5.** Lipid profile of *LPIAT* mutant seeds. 50 seeds and 25 mg seeds were used for neutral lipid and polar lipid quantification, respectively. Lipids were extracted from dry seeds or after 5h imbibition, separated by TLC, and quantified by GC-FID after transesterification. Values are mean  $\pm$  SD (n=6)

(A) Neutral lipid composition; (B) Fatty acid composition of TAG; (C) Polar lipid composition; (D) Fatty acid composition of PI
