# Supplementary material for: LPIAT, a lyso-Phosphatidylinositol Acyltransferase, Modulates Seed Germination in Arabidopsis thaliana through PIP Signalling Pathways and is Involved in Hyperosmotic Response
Source: MDPI journal article supplement (doi:10.3390/ijms21051654), 2020-02-28
Supplement: s1 [file s1]

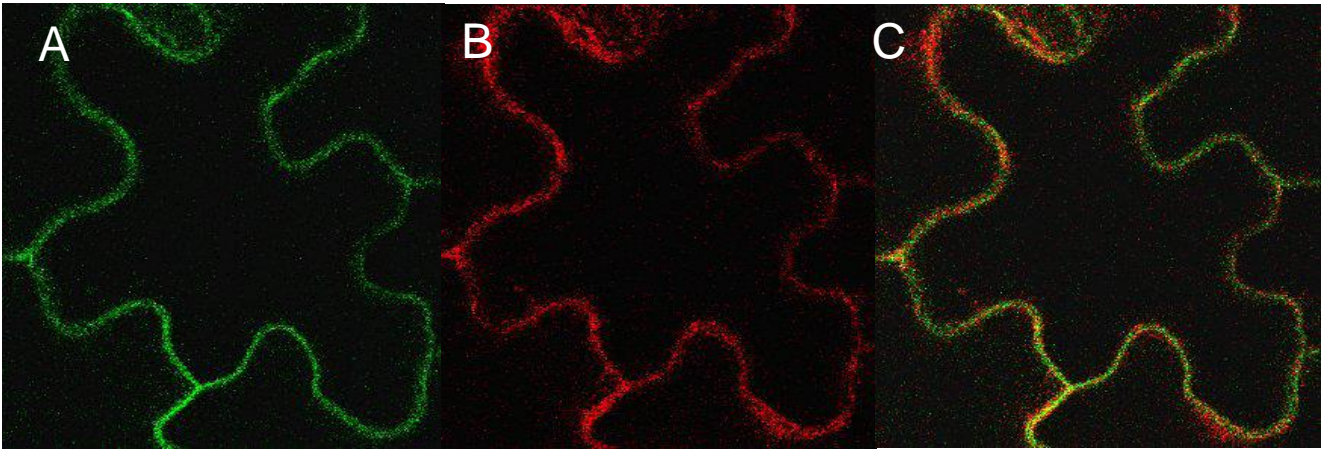

**Figure S2.** Localization of *LPIAT*-YFP in a tobacco leaf epidermal cell. (A) plasmalemma marker PMA4-GFP (green); (B): *LPIAT*-YFP (red); (C): co-expression of *LPIAT*-YFP and PMA4-GFP in the plasmalemma of tobacco cell
