# Supplementary material for: LPIAT, a lyso-Phosphatidylinositol Acyltransferase, Modulates Seed Germination in Arabidopsis thaliana through PIP Signalling Pathways and is Involved in Hyperosmotic Response
Source: MDPI journal article supplement (doi:10.3390/ijms21051654), 2020-02-28
Supplement: s1 [file s1]

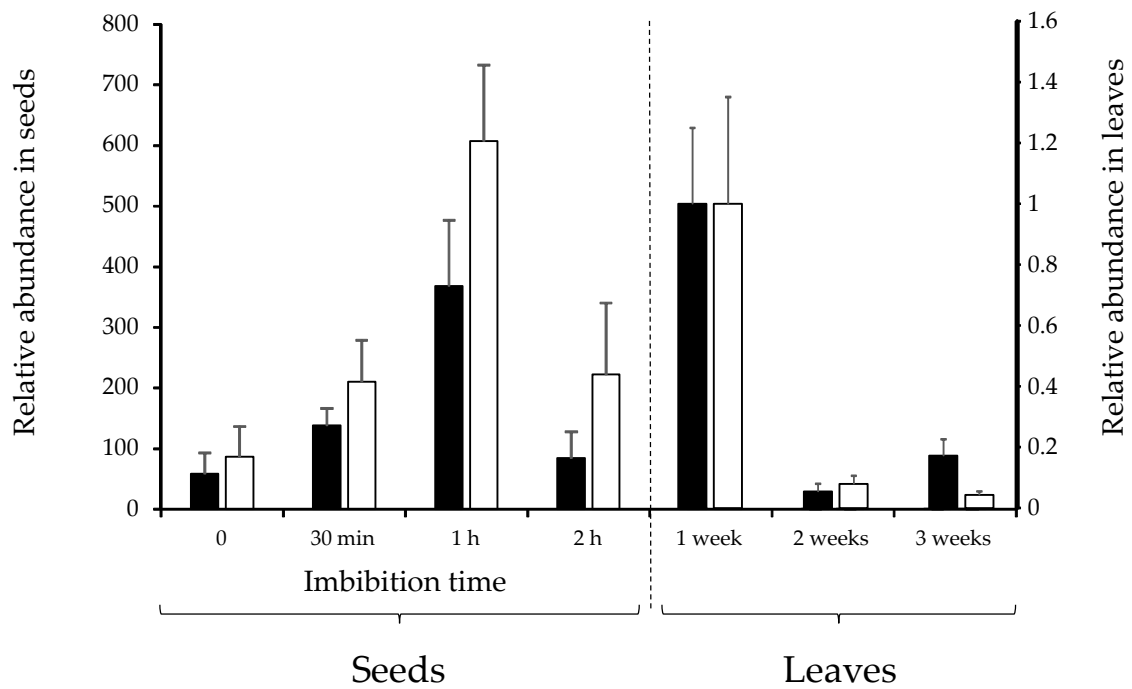

**Figure S4.** Determination of *LPIAT* mRNA levels by real-time PCR in seeds upon imbibition and in leaves in wild-type. Values represent mean  $\pm$  SD of three technical replicates for two biological replicates (black and white boxes). Relative expression quantities are represented related to one-week old leaves level, which was set to one.
