# Supplementary material for: LPIAT, a lyso-Phosphatidylinositol Acyltransferase, Modulates Seed Germination in Arabidopsis thaliana through PIP Signalling Pathways and is Involved in Hyperosmotic Response
Source: MDPI journal article supplement (doi:10.3390/ijms21051654), 2020-02-28
Supplement: s1 [file s1]

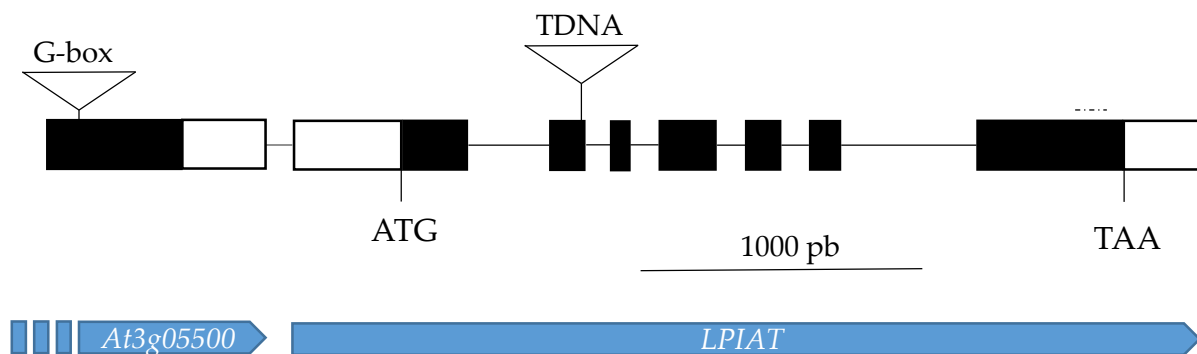

**Figure S1.** Structure of *LPIAT*. Black box, exons; white box, untranslated regions; black line, introns. dashed line, sequence amplified for RT-qPCR experiment. T-DNA insertion is located within the exon 2., the position of a putative G-box within the last exon of *At3g05500g* is showed.
