# Supplementary material for: LPIAT, a lyso-Phosphatidylinositol Acyltransferase, Modulates Seed Germination in Arabidopsis thaliana through PIP Signalling Pathways and is Involved in Hyperosmotic Response
Source: MDPI journal article supplement (doi:10.3390/ijms21051654), 2020-02-28
Supplement: s1 [file s1]

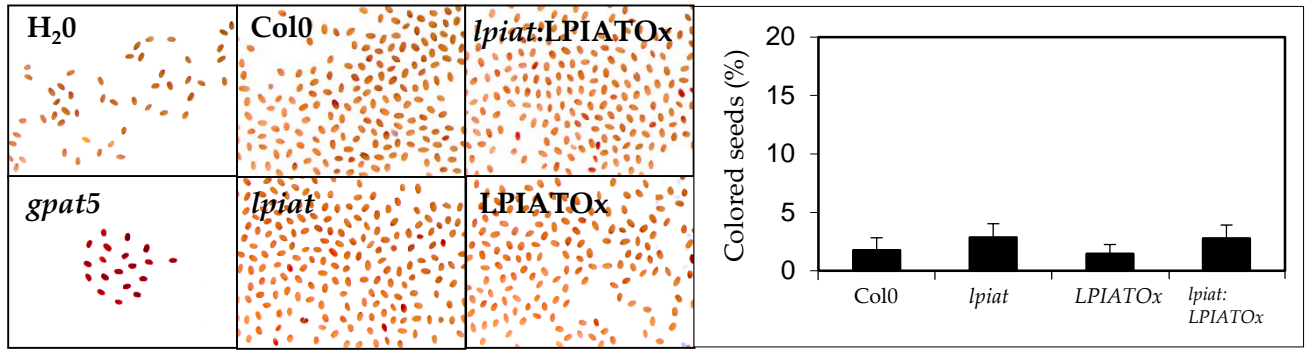

**Figure S7.** Permeability of *LPIAT* mutant seeds is not altered. Arabidopsis dry seeds were incubated in the dark at 30°C for 48 h in an aqueous solution of 1% (w/v) tetrazolium salt. *gpat5* mutant was used as positive control. Percentage of positive seeds was calculated using image J software. Values are means  $\pm$  SD of 4 biological replicates from 3 independent experiments
